# Supplementary material for: A shape-memory and spiral light-emitting device for precise multisite stimulation of nerve bundles
Source: PubMed Central journal article supplement (PMC6594927; doi:10.1038/s41467-019-10418-3), 2019-06-26
Supplement: 41467_2019_10418_MOESM1_ESM.pdf [file 41467_2019_10418_MOESM1_ESM.pdf]

1 Supplementary Information

2

3 **A Shape-Memory and Spiral Light-Emitting Device for Multisite Precise**  
4 **Stimulation of Nerve Bundles**

5

6 Hao Zheng<sup>1,4</sup>, Zhitao Zhang<sup>2,4</sup>, Su Jiang<sup>1,4</sup>, Biao Yan<sup>1,4</sup>, Xiang Shi<sup>2</sup>, Yuanting Xie<sup>1</sup>,  
7 Xu Huang<sup>1</sup>, Zeyang Yu<sup>3</sup>, Huizhu Liu<sup>1</sup>, Shijun Weng<sup>1</sup>, Arto Nurmikko<sup>3</sup>, Yuqiu Zhang<sup>1</sup>,  
8 Huisheng Peng<sup>2,5</sup>, Wendong Xu<sup>1,5</sup>, Jiayi Zhang<sup>1,5</sup>

9

10 <sup>1</sup>State Key Laboratory of Medical Neurobiology and MOE Frontier Center for Brain  
11 Science, Institutes of Brain Science, Department of Hand Surgery, National Clinical  
12 Research Center for Aging and Medicine, Huashan Hospital, Fudan University,  
13 Shanghai 200433, China.

14

15 <sup>2</sup>State Key Laboratory of Molecular Engineering of Polymers, Department of  
16 Macromolecular Science, and Laboratory of Advanced Materials, Fudan University,  
17 Shanghai 200438, China.

18

19 <sup>3</sup>School of Engineering, Brown University, Providence, Rhode Island 02912, USA.

20

21 <sup>4</sup>These authors contributed equally: Hao Zheng, Zhitao Zhang, Su Jiang, Biao Yan

22

23 <sup>5</sup>These authors jointly supervised this work: Jiayi Zhang, Wendong Xu and Huisheng  
24 Peng and; E-mail addresses: jiyizhang@fudan.edu.cn, wendongxu@fudan.edu.cn  
25 and penghs@fudan.edu.cn.

26

27

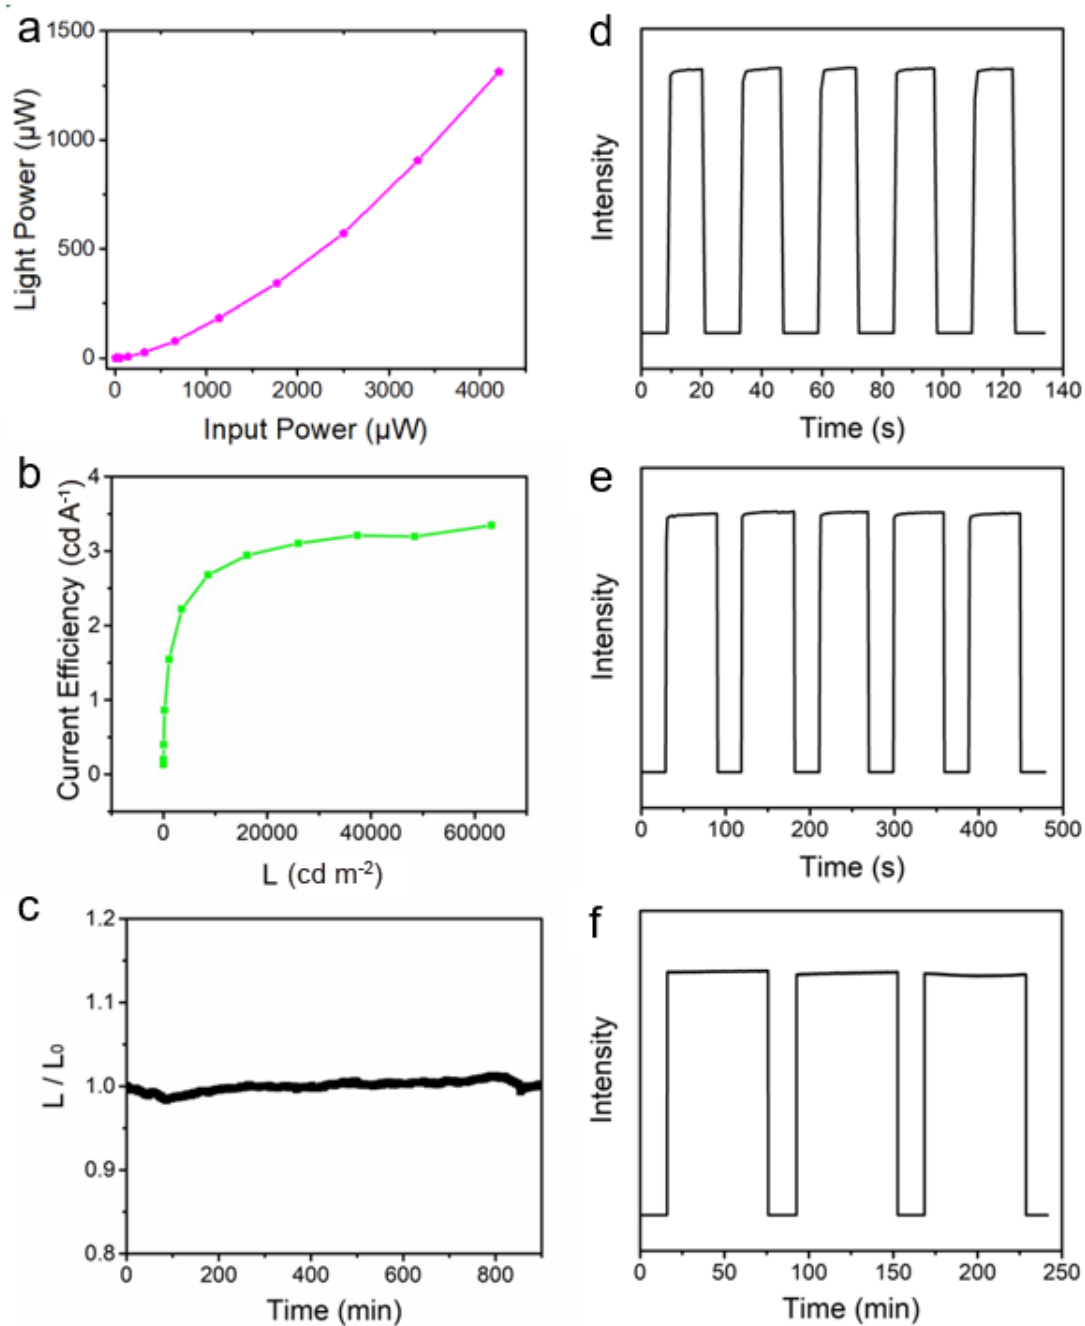

29

30 **Supplementary Figure 1.** Characterization of mini-LED. (a) Power efficiency for one  
 31 mini-LED. Voltages applied to each mini-LED were 2.3 – 2.9 V. (b) Current efficiency for  
 32 one mini-LED. Voltages applied to each mini-LED were 2.3 – 2.9 V.  $L$ : luminescence. (c)  
 33 Normalized luminescence of one mini-LED in 15 hr.  $L/L_0$ : luminescence power normalized

34 by the value at the beginning of the test ( $t = 0$ ). **(d-f)** Luminescence of one mini-LED upon  
35 ON cycles. The duration of ON cycle is 10 sec, 1 min and 1 hr, respectively.

36  
37

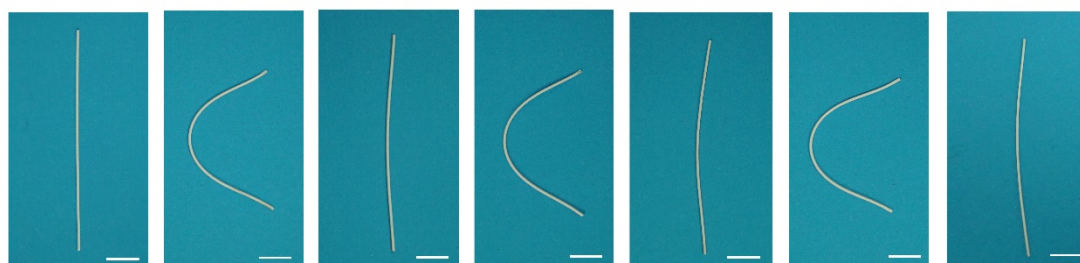

38 Original 1st fixation 1st recovery 2nd fixation 2nd recovery 3rd fixation 3rd recovery  
39

40 **Supplementary Figure 2.** Shape-memory feature of polyurethane fibers. One single  
41 polyurethane fiber went through the process of 1<sup>st</sup> fixation – 1<sup>st</sup> recovery – 2<sup>nd</sup> fixation – 2<sup>nd</sup>  
42 recovery – 3<sup>rd</sup> fixation – 3<sup>rd</sup> recovery. Scale bar: 1 cm.

43

44

45

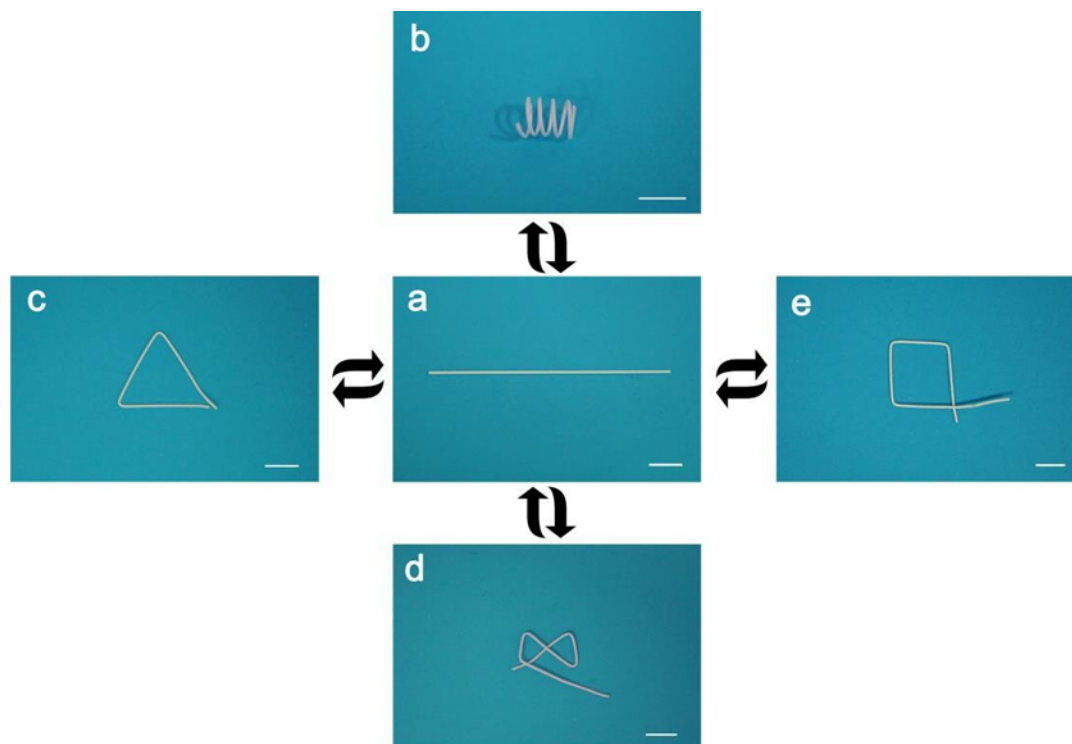

46

47

48 **Supplementary Figure 3.** Polyurethane fibers were fabricated into different shapes. **(a)**

49 Original shape of the fiber; **(b)** spiral-shaped fiber; **(c)** triangle-shaped fiber; **(d)** knot-shaped

50 fiber; **(e)** square-shaped fiber. Scale bar : 1 cm.

51

52

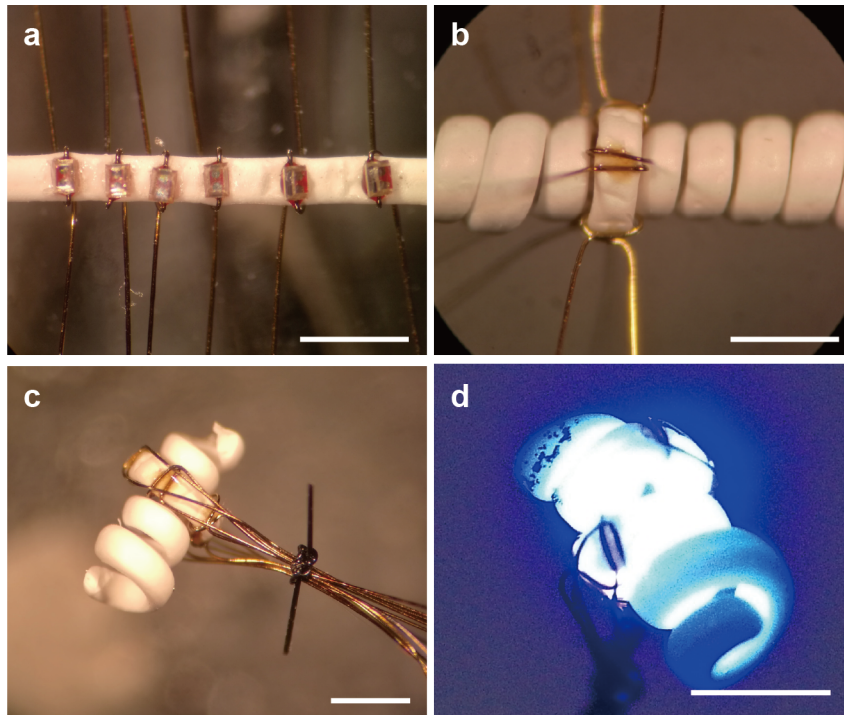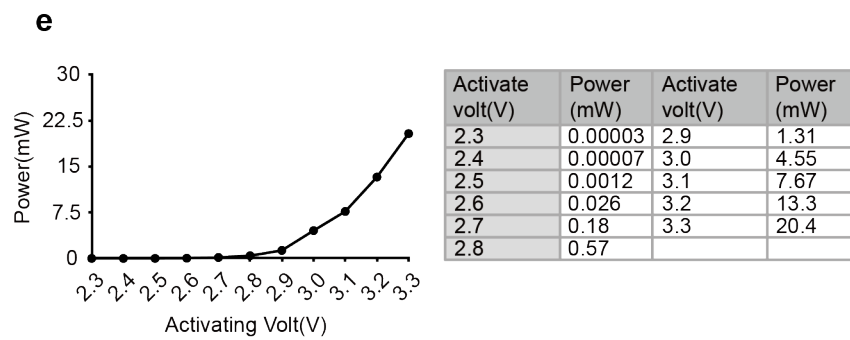

53

54 **Supplementary Figure 4.** MOSD fabrication. (a) Mini-LEDs with insulated copper wires

55 were attached to the fiber. (b) The fiber was twined and spiral shaped. (c) Restrained copper

56 wire. (d) MOSD with mini-LEDs on. (e) Light power driven by different voltages. Scale bars

57 are 500  $\mu\text{m}$  (a-d).

58

59

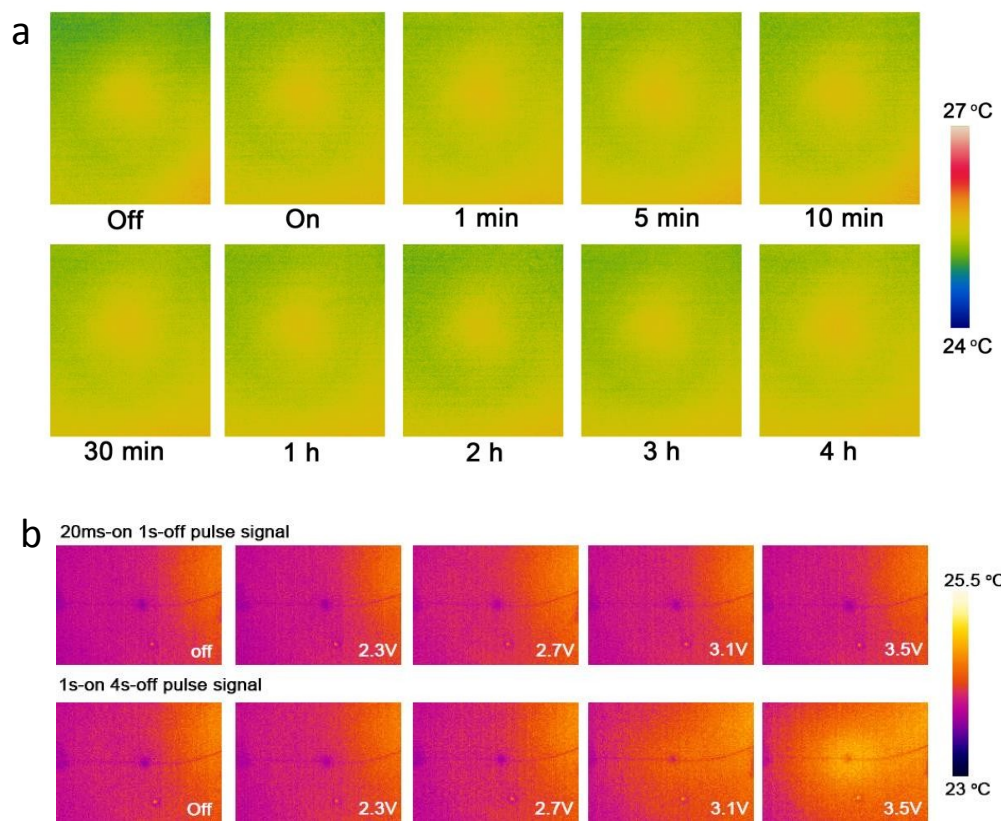

60

61 **Supplementary Figure 5.** Temperature change of one LED. (a) Mini-LED was turned on  
 62 continuously at 2.5 V (0.0012 mW) and the temperature was measured by Optris Infrared  
 63 Thermometers. (b) Mini-LED was turned on from 2.3V to 3.5V (0.00003 mW - 33.1 mW) at  
 64 both 20 msec-on/1 sec-off and 1 sec-on/4 sec-off modes.

65

66

67

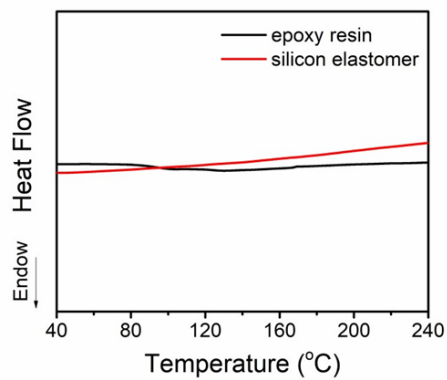

68

69

70 **Supplementary Figure 6.** Differential scanning calorimetry (DSC) of epoxy resin and  
71 silicon elastomer used for MOSD encapsulation.

72

73

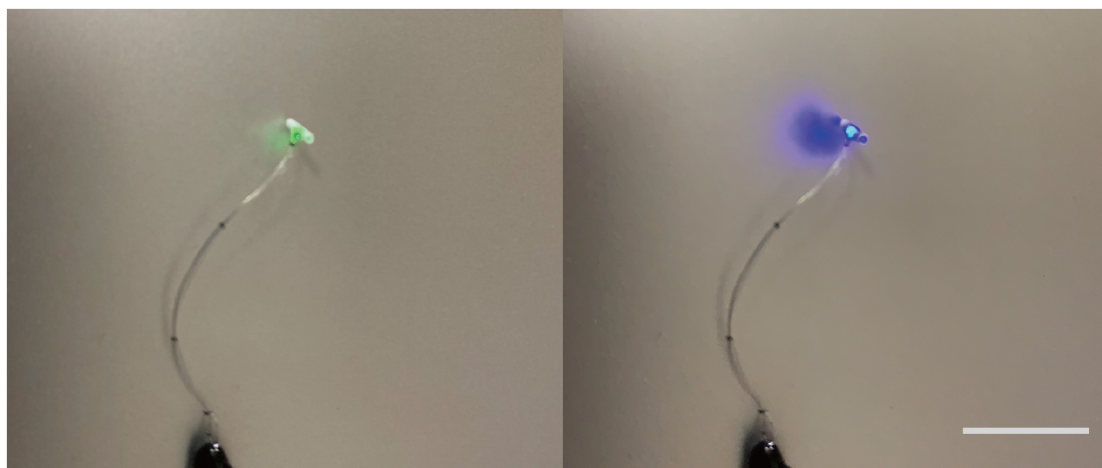

74

75 **Supplementary Figure 7.** MOSD fabricated with platinum wires. Both blue and green  
76 mini-LEDs were fabricated onto the same MOSD. Scale bar is 5 mm.

77

78

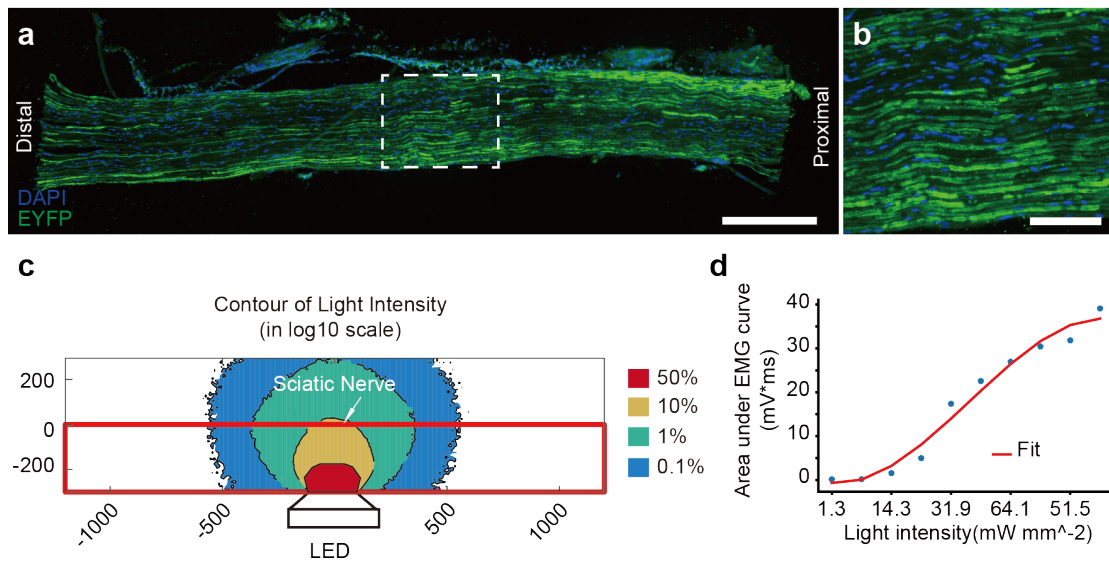

79

80 **Supplementary Figure 8.** Immunofluorescence images of transverse sciatic nerve in  
81 Thy1-ChR2-EYFP mice. (a-b), Transverse section of sciatic nerve. Green, ChR2-EYFP. Blue,  
82 DAPI. (c) Monte-Carlo simulation of LED light intensity distribution across and around the  
83 mouse sciatic nerve on transverse section. (d) EMG areas stimulated by MOSD with different  
84 voltages. Scale bars are 300  $\mu\text{m}$  (a) and 100  $\mu\text{m}$  (b).

85

86

87

88



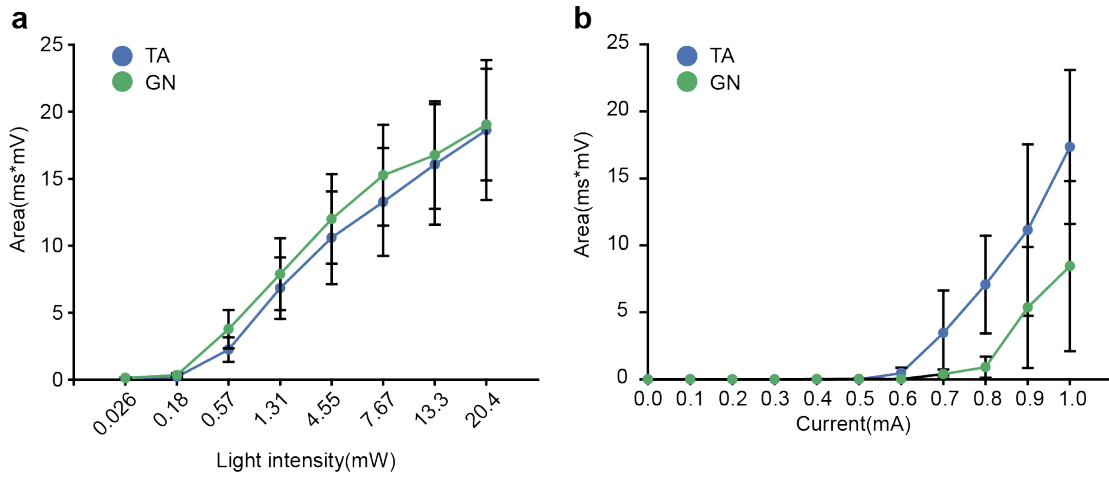

90

91 **Supplementary Figure 9.** EMG responses of GN and TA muscles under electrical and  
 92 single-site optogenetic stimulation. (a) EMG area with single-site optogenetic stimulation (n  
 93 = 5 mice, 20 msec-on/ 2 sec-off). (b) EMG area with electrical stimulation (n = 3 mice, 0.2  
 94 msec-on/ 1 sec-off). Data are presented as mean ± s.e.m..

95

96

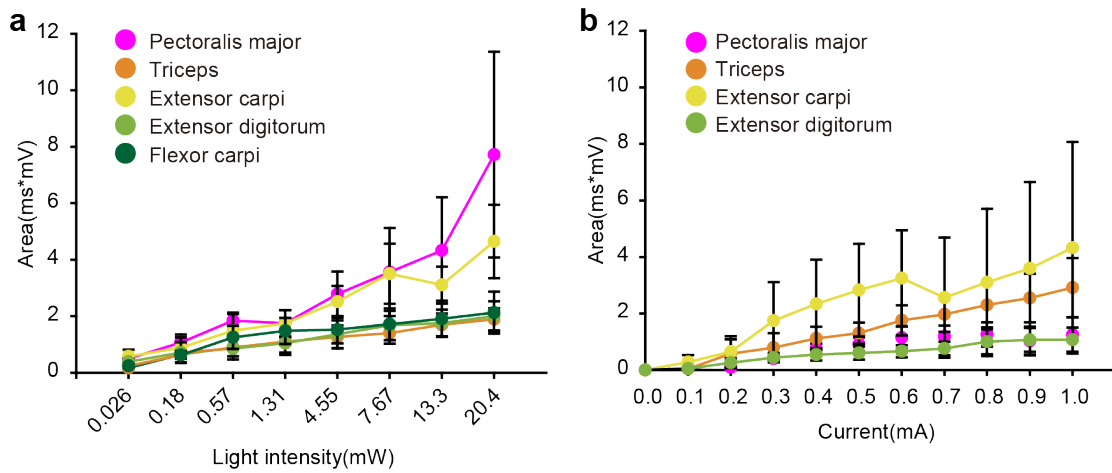

97

98 **Supplementary Figure 10.** EMG responses of PM, Tr, EC, FC and ED muscles under  
 99 electrical and single-site optogenetic stimulation with different stimulation current. (a) EMG  
 100 area with single-site optogenetic stimulation (n = 7 mice, 20 msec-on/ 2 sec-off). (b) EMG  
 101 area with electrical stimulation (n = 3 mice, 0.2 msec-on/ 1 sec-off). Data are presented as  
 102 mean ± s.e.m.

103

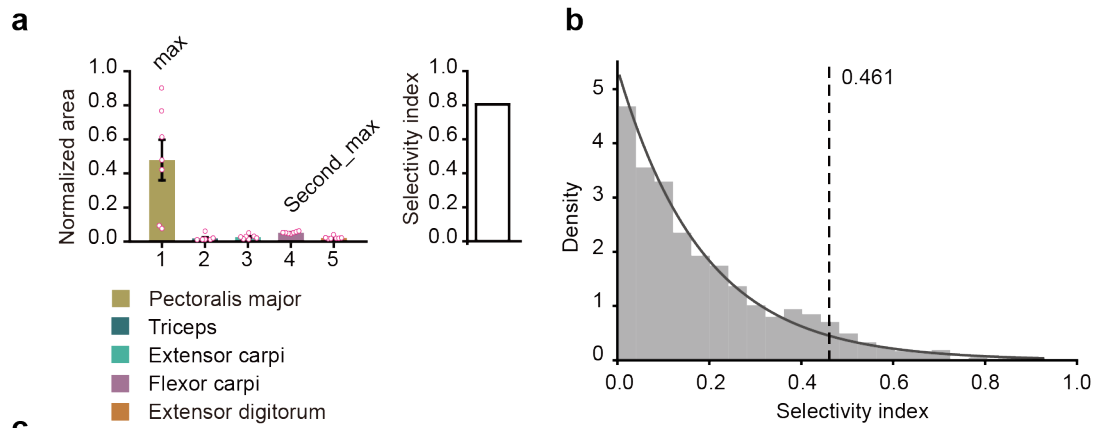

| mouse index | number of muscles with above-threshold selectivity (MOSD) | number of muscles with above-threshold selectivity (SS) |
|-------------|-----------------------------------------------------------|---------------------------------------------------------|
| 1           | 0                                                         | 0                                                       |
| 2           | 1                                                         | 1                                                       |
| 3           | 3                                                         | 0                                                       |
| 4           | 2                                                         | 0                                                       |
| 5           | 2                                                         | 0                                                       |
| 6           | 1                                                         | 1                                                       |
| 7           | 1                                                         | 0                                                       |
| 8           | 1                                                         | 0                                                       |
| 9           | 0                                                         | 1                                                       |
| 10          | 4                                                         | 0                                                       |
| 11          | 2                                                         | 0                                                       |
| 12          | 1                                                         | 0                                                       |
| 13          | 1                                                         | 0                                                       |
| 14          | 0                                                         | 0                                                       |
| 15          | 2                                                         | 0                                                       |

104

105 **Supplementary Figure 11.** Distribution of selectivity indices and definition of selectivity

106 threshold. (a) Example normalized myoelectric area and selectivity index under one

107 illumination condition (the illumination condition from different mouse is 0.00003 mW - 20.

108 4 mW) for one mouse (6 trials, mouse #4 from Supplementary Figure 15 b). (b) Histogram of

109 density distribution of selectivity indices of all mice under delivered with MOSD. Selectivity

110 index was defined as  $(Area_{max} - Area_{second\_max}) / (Area_{max} + Area_{second\_max})$  (See Methods for

111 details). Threshold for selectivity index was 0.46 (mean + 2 s.d.) (1.31 mW). Distribution

112 fitted with exponential function. (c) Summary of number of muscles and number of

113 illumination conditions with selectivity indices above threshold for each mouse (0.00003 mW

114 - 20.4 mW).

115

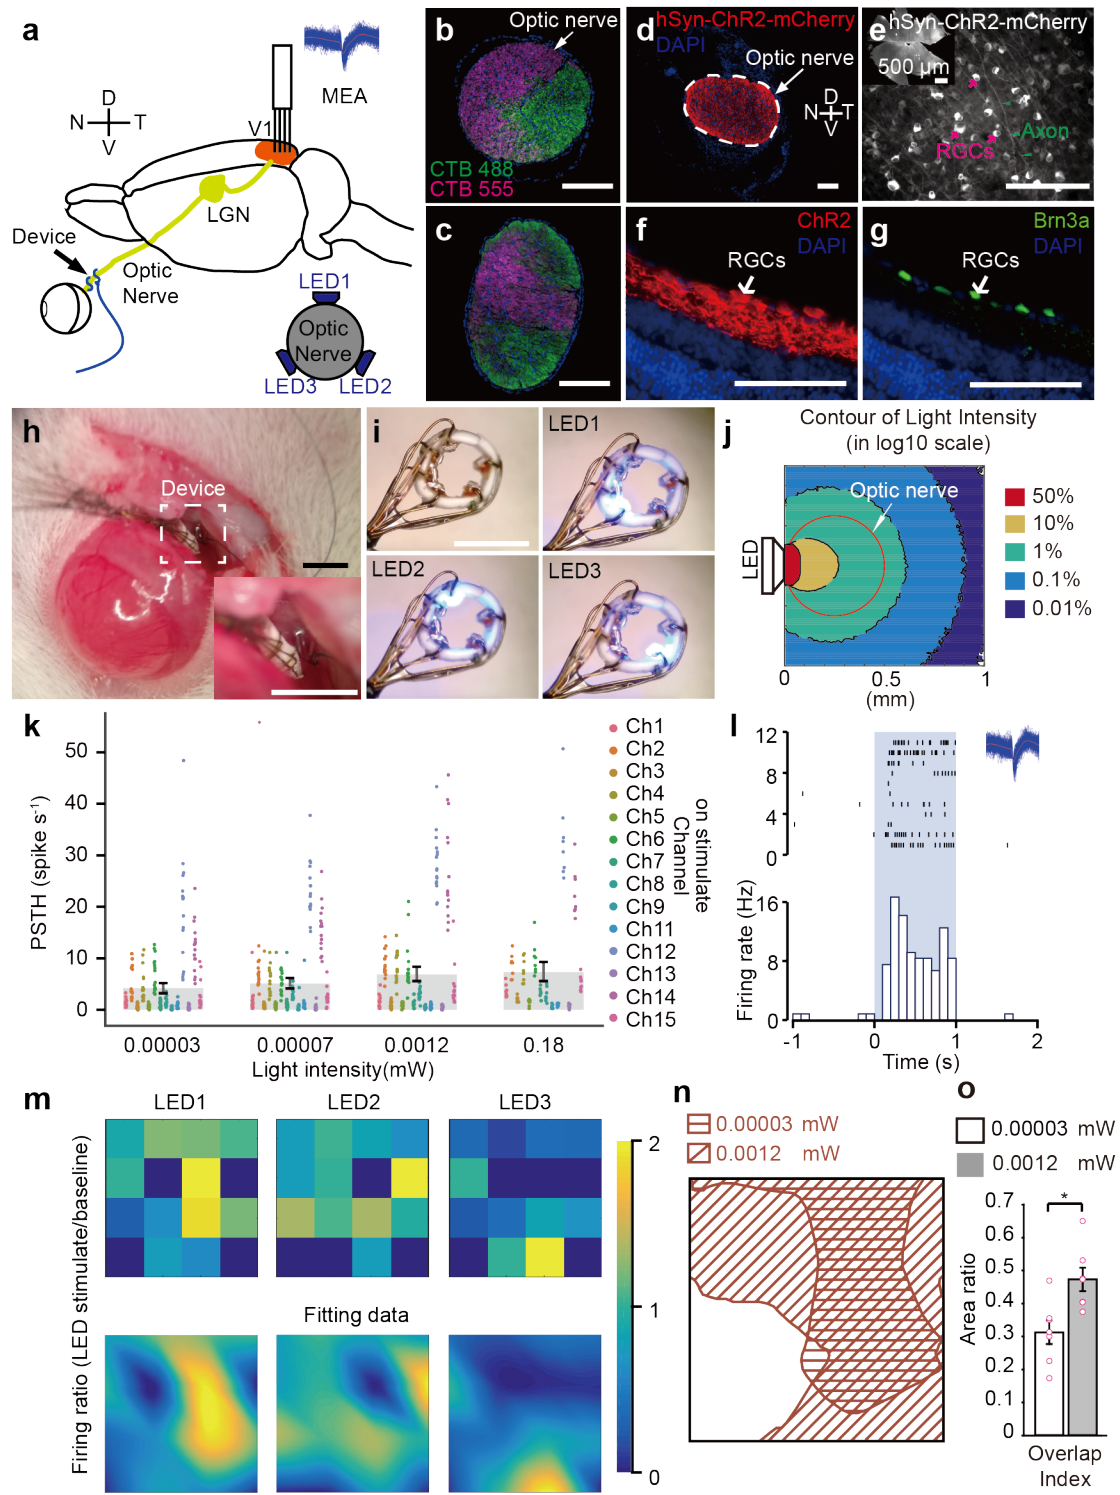

116

117 **Supplementary Figure 12.** Implanted MOSD for retinotopic activation. (a) Schematic

118 diagram of the wiring and electrophysiological recording of nerve fiber activation on V1 rat

119 with intraocular AAV-hSyn-ChR2-mCherry injection. Three mini-LEDs were placed

120 around the optic nerve. MEA: multichannel electrode array, D: dorsal, V: ventral, N: nasal, T:

121 temporal. **(b-c)** Cross section of the optic nerve 1.5–2 mm from the eyeball. Green, CTB488.  
122 Red, CTB555. Blue, DAPI. **(b)** CTB555 was intraocularly injected into the nasal retina, and  
123 CTB488 was intraocularly injected into the temporal retina. **(c)** CTB555 was intraocularly  
124 injected into the dorsal retina, and CTB488 was intraocularly injected into the ventral retina.  
125 **(d)** ChR2 expression in the optic nerve. Red, ChR2-mCherry. Blue, DAPI. **(e-g)** ChR2  
126 expression in retinal ganglion cells in the retina. Green, brn3a. Blue, DAPI. **(h)** The MOSD  
127 implanted on the optic nerve. **(i)** Images of three mini-LEDs turned on individually at 0.0012  
128 mW. **(j)** Monte-Carlo simulation of the LED light intensity distribution across and around the  
129 rat optic nerve, indicated by the red circle. Note, an adult rat optic nerve has a diameter of 500  
130  $\mu\text{m}$ , which is larger than that of the mice sciatic nerve (300  $\mu\text{m}$ ). **(k)** Peristimulus time  
131 histogram (PSTH, spike  $\text{s}^{-1}$ ) of V1 neurons stimulated with different light intensities (turned  
132 on for 1 sec-on/4 sec-off at 0.18 mW) by mini-LED1–3 (0.00003 mW - 0.18 mW). **(l)** Local  
133 field potential, power spectrum density, and PSTH of V1 neurons in response to MOSD  
134 stimulation (turned on for 1 sec-on/4 sec-off at 0.18 mW). **(m)** Heatmap (upper) and Lowess  
135 fitting (lower) of the firing ratio (firing rates with the MOSD turned on divided by those with  
136 the MOSD turned off) at 0.00003 mW. **(n)** Lowess fitting of the MOSD-activated area (firing  
137 ratio > 1) at 0.00003 mW and 0.0012 mW. **(o)** Overlap index of V1 activation area induced  
138 by different mini-LEDs at 0.00003 mW and 0.0012 mW (n = 7 mice, Paired t test, \* $P < 0.05$ .).  
139 Data are presented as mean  $\pm$  s.e.m. Scale bars are 100  $\mu\text{m}$  **(b-g)**, 1 mm **(h-i)**.  
140

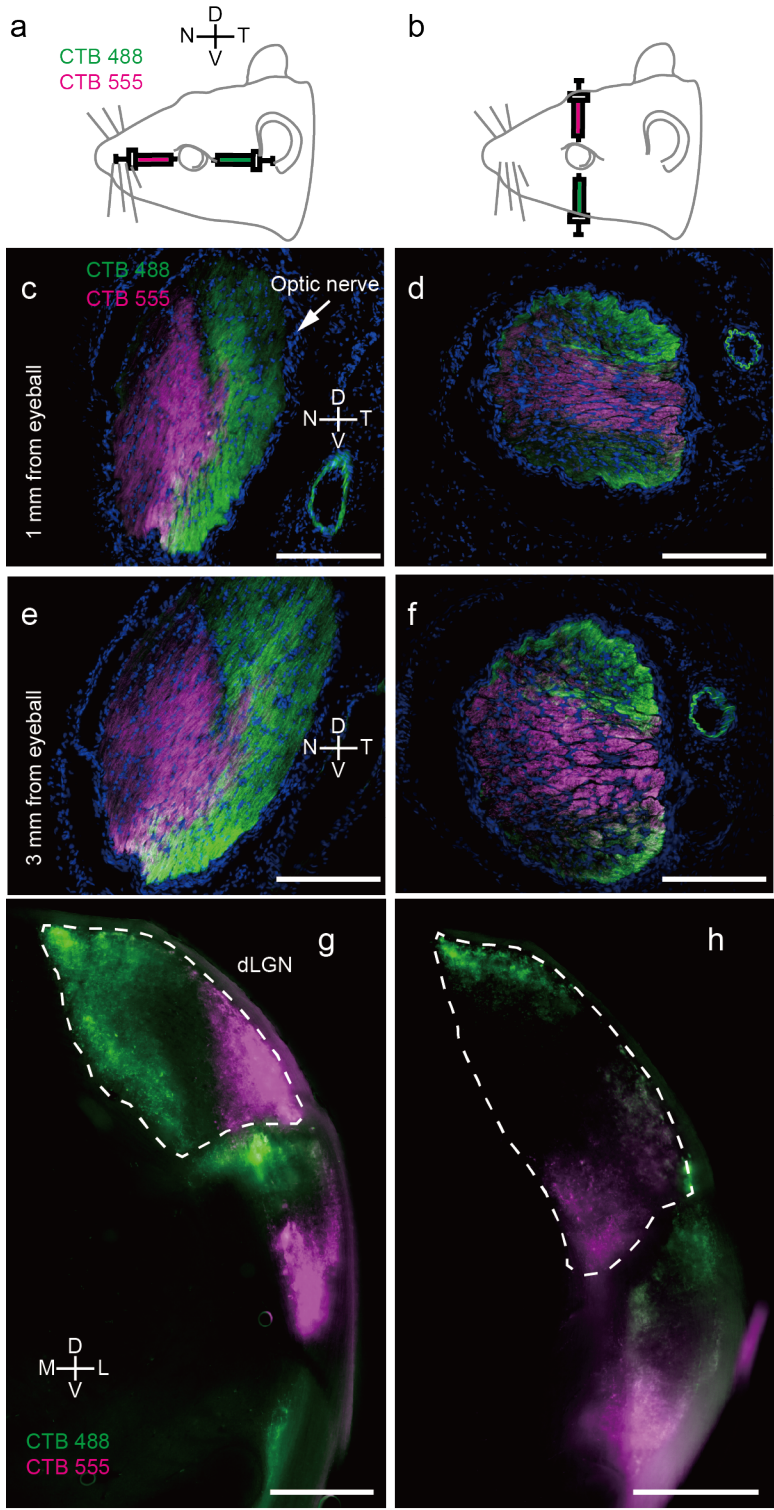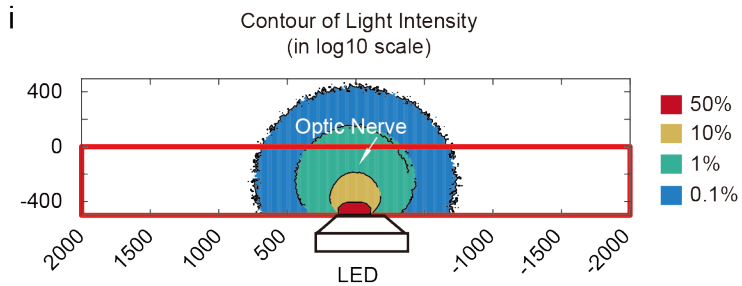

142 **Supplementary Figure 13.** Topographic projection between optic nerve and lateral  
 143 geniculate nucleus (LGN). **(a, b)** Intraocular injection of fluorescent dyes at different  
 144 positions of the retina. CTB488 (green) and CTB555 (red) were intraocularly injected in a  
 145 nasal-temporal or dorsal-ventral manner (700 nl per site, left eye). **(c, d, e, f)** Cross sections of  
 146 optic nerve at 1 mm or 3 mm from the eye ball. Red, CTB555. Green, CTB488. Blue, DAPI.  
 147 **(g, h)** Retinal axons in dorsal lateral geniculate nucleus (dLGN) and ventral lateral geniculate  
 148 nucleus (vLGN). Red, CTB555. Green, CTB488. M, medial; L, lateral; D, dorsal; V, ventral.  
 149 **(i)** Monte-Carlo simulation of light intensity distribution across and around the rat optic nerve  
 150 on transverse section. Scale bars are 100  $\mu\text{m}$  **(c-f)**, 200  $\mu\text{m}$  **(g-h)**.

151

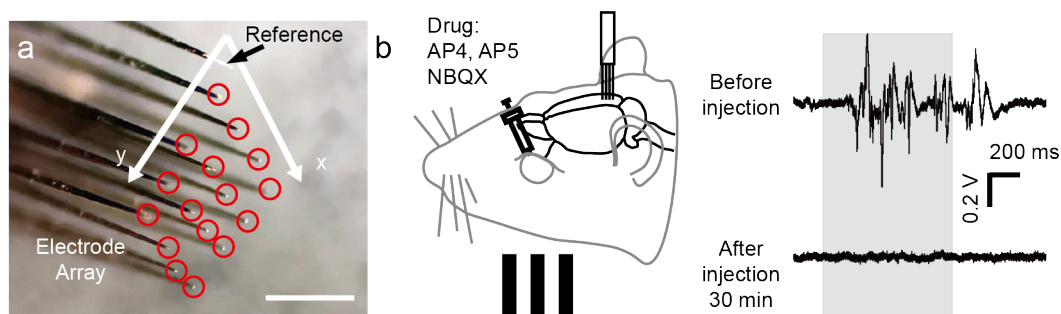

153 **Supplementary Figure 14.** Inhibition of responses to drifting gratings in V1 neurons using  
 154 AP4, AP5 and NBQX. **(a)** Image of multichannel electrode array (MEA). **(b)** Schematics of  
 155 the electrophysiology recordings with intravitreal injection of glutamatergic antagonist  
 156 cocktail (left). Light responses in V1 before the injection and after injection 30 min (right).  
 157 Shade area indicated the presentation of drifting gratings to the contralateral eye. Scale bar is  
 158 500  $\mu\text{m}$  **(a)**.

159

160

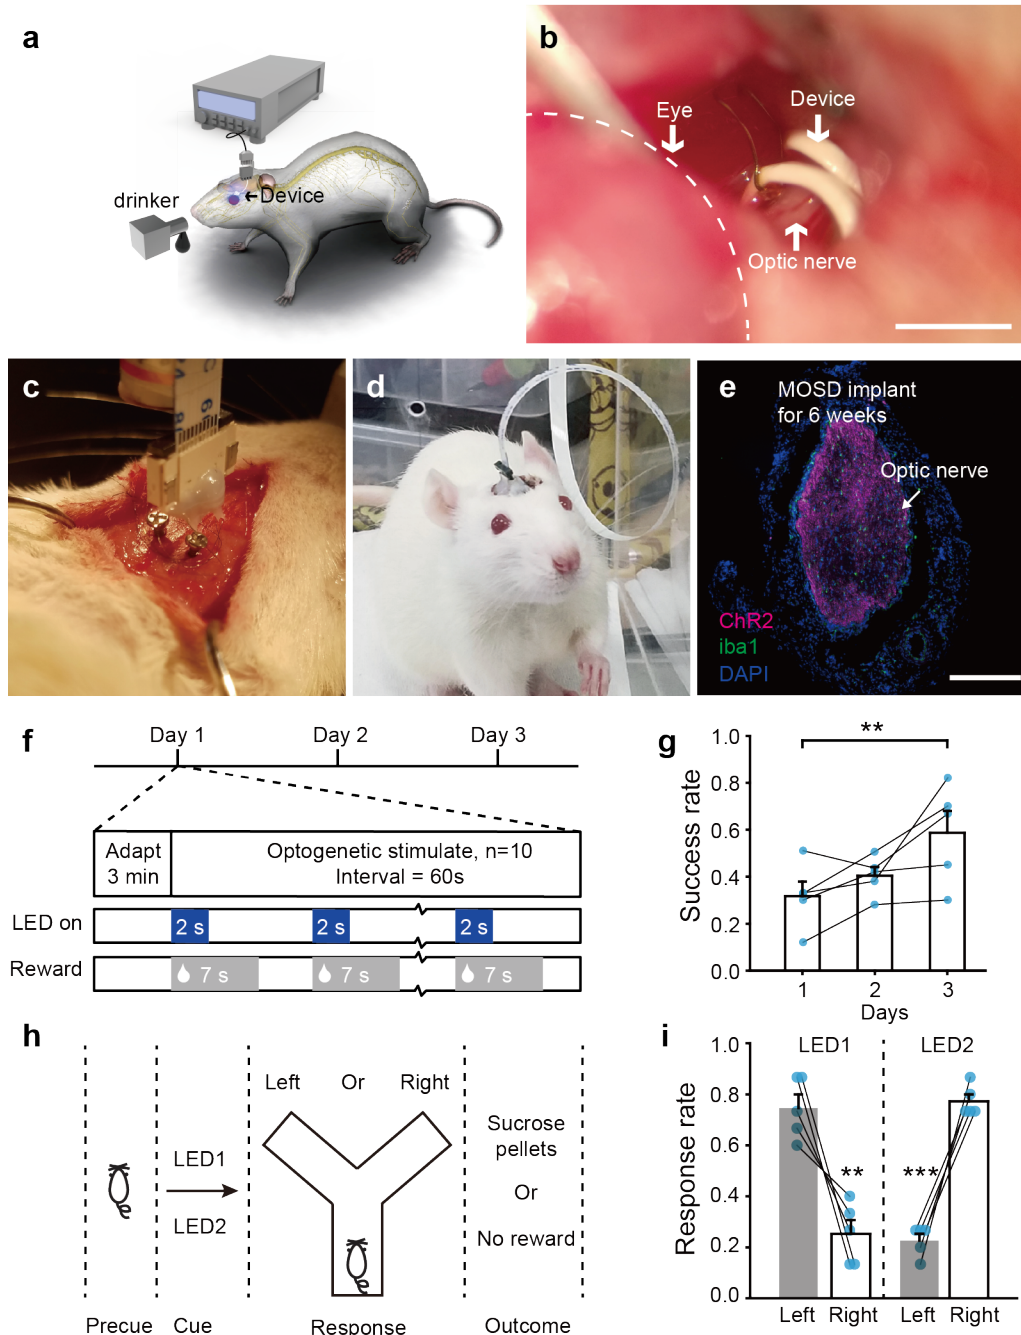

161

162 **Supplementary Figure 15.** Associated learning in freely moving rats implanted with

163 MOSD. (a) Intraocular injection of AAV-hSyn-ChR2-mCherry (left). Schematic of the

164 training chamber (right). (b) Image of the MOSD firmly implanted onto a rat's optic nerve. (c)

165 Head-mounted flexible printed circuit adapter on the skull of the rat. (d) A

166 postimplant-surgery rat wearing the head-mounted MOSD. (e) The immunohistochemistry

167 from rat optic nerve with MOSD implanted over 3 weeks. (f) Behavioral training scheme.

168 After 3 min of habituation, each rat went through 10 training trials. In each 1-min trial, the  
169 mini-LED was turned on for 2 sec at 0.18 mW. The animal was allowed to lick water for 5  
170 sec (0.05 mL water), followed by a 53-sec interval. **(g)** The ratio of successful water-licking  
171 trials to all trials in each training day. Data are represented as mean  $\pm$  s.e.m. (n = 5 rats, 0.18  
172 mW, LED1: 20 msec-on/ 20 msec-off, LED2: 500 msec-on/ 500 msec-off; One way repeated  
173 measures ANOVA with Tukey post hoc,  $**P < 0.01$ ). **(h)** Schematics of 2-choice Y maze.  
174 The rats were cued with different mini-LEDs (0.18 mW, 20 msec-on/20 msec-off for  
175 mini-LED1 and 500 msec-on/500 msec-off for mini-LED2 for 10 sec) and rewarded with  
176 sucrose pellets if they chose the correct arm. **(i)** The response of rats in Y maze with distinct  
177 mini-LEDs (n = 5 rats, 0.18 mW, 2 sec, two way repeated measures ANOVA with Tukey post  
178 hoc). Data are represented as mean  $\pm$  s.e.m.;  $**P < 0.01$ ,  $***P < 0.001$ . Scale bars are 1 mm  
179 **(b)**, 200  $\mu$ m **(e)**.  
180



181

182

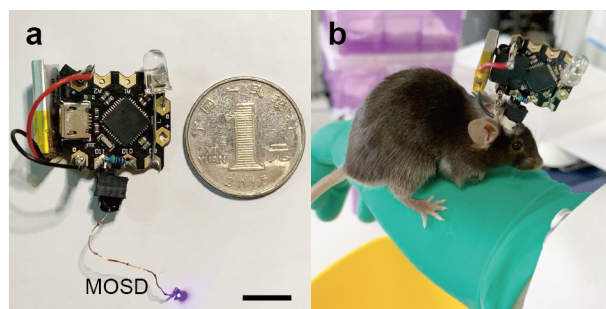

183

184 **Supplementary Figure 16.** Miniaturized stimulation headstage for MOSD. **(a)** MOSD and

185 the miniaturized stimulation headstage. **(b)** A mouse implanted with MOSD and connected to

186 the stimulation headstage. Scale bar is 1 cm **(a)**.

187

188

189

| Quantity                          | Symbol                     | Value | Unit             | Source                          |
|-----------------------------------|----------------------------|-------|------------------|---------------------------------|
| Diameter of Sciatic Nerve         | d                          | 0.3   | mm               | Measured in this manuscript     |
| Refractive Index of Sciatic Nerve | $n_{\text{Sciatic Nerve}}$ | 1.40  | n.a.             | Yaroslavsky, 2002 <sup>47</sup> |
| Absorption Coefficient            | $\mu_a$                    | 0.5   | $\text{mm}^{-1}$ | Yaroslavsky, 2002 <sup>47</sup> |
| Reduced Scattering Coefficient    | $\mu_s'$                   | 1.56  | $\text{mm}^{-1}$ | Jacques, 2013 <sup>46</sup>     |
| Anisotropy                        | g                          | 0.90  | n.a.             | Jacques, 2013 <sup>46</sup>     |

190 **Supplementary Table 1. Parameters of optical properties for mice sciatic nerve and**

191 **C7 nerve.**

192

| Mouse sciatic nerve |                  | Light intensity [ $\text{mW mm}^{-2}$ ] |         |         |
|---------------------|------------------|-----------------------------------------|---------|---------|
| Voltage (V)         | light Power (mW) | At the mini-LED                         | Middle  | Far end |
| 2.3                 | 0.00003          | 0.0013                                  | 0.00059 | 0.00020 |
| 2.4                 | 0.00007          | 0.0031                                  | 0.0014  | 0.00046 |
| 2.5                 | 0.0012           | 0.052                                   | 0.023   | 0.0079  |
| 2.6                 | 0.026            | 1.14                                    | 0.51    | 0.17    |
| 2.7                 | 0.18             | 7.99                                    | 3.58    | 1.21    |
| 2.8                 | 0.57             | 24.9                                    | 11.2    | 3.78    |
| 2.9                 | 1.31             | 57.2                                    | 25.6    | 8.67    |
| 3                   | 4.55             | 198.1                                   | 88.8    | 30.0    |
| 3.1                 | 7.67             | 334.4                                   | 149.8   | 50.7    |
| 3.2                 | 13.3             | 579.6                                   | 259.7   | 87.9    |
| 3.3                 | 20.4             | 889.0                                   | 398.3   | 134.8   |
| 2.45                | 0.3              | 13.1                                    | 5.86    | 1.98    |

194 **Supplementary Table 2. Monte Carlo simulation of light intensities at the mini-LED**  
195 **light-emitting surface, middle and far end of the cross section of the mice sciatic nerve.**

196

197

| Mouse C7    |                  | Light intensity [mW mm <sup>-2</sup> ] |         |         |
|-------------|------------------|----------------------------------------|---------|---------|
| Voltage (V) | light Power (mW) | At the mini-LED                        | Middle  | Far end |
| 2.3         | 0.00003          | 0.0013                                 | 0.00089 | 0.00039 |
| 2.4         | 0.00007          | 0.0030                                 | 0.0021  | 0.00092 |
| 2.5         | 0.0012           | 0.05                                   | 0.035   | 0.015   |
| 2.6         | 0.026            | 1.14                                   | 0.77    | 0.34    |
| 2.7         | 0.18             | 7.99                                   | 5.41    | 2.40    |
| 2.8         | 0.57             | 24.9                                   | 16.9    | 7.49    |
| 2.9         | 1.31             | 57.2                                   | 38.7    | 17.2    |
| 3           | 4.55             | 198.1                                  | 134.2   | 59.5    |
| 3.1         | 7.67             | 334.4                                  | 226.6   | 100.5   |
| 3.2         | 13.3             | 579.6                                  | 392.6   | 174.2   |
| 3.3         | 20.4             | 889.0                                  | 602.2   | 267.2   |
| 2.45        | 0.3              | 13.1                                   | 8.86    | 3.93    |

198 **Supplementary Table 3. Monte Carlo simulation of light intensities at the mini-LED**

199 **light-emitting surface, middle and far end of the cross section of the mice C7 nerve.**

| Quantity                        | Symbol                   | Value | Unit             | Source                          |
|---------------------------------|--------------------------|-------|------------------|---------------------------------|
| Diameter of Optic Nerve         | d                        | 0.5   | mm               | Hughes, 1977 <sup>44</sup>      |
| Refractive Index of Optic Nerve | $n_{\text{Optic Nerve}}$ | 1.40  | n.a.             | Yaroslavsky, 2002 <sup>47</sup> |
| Absorption Coefficient          | $\mu_a$                  | 0.5   | $\text{mm}^{-1}$ | Yaroslavsky, 2002 <sup>47</sup> |
| Reduced Scattering Coefficient  | $\mu_s'$                 | 2.59  | $\text{mm}^{-1}$ | Jacques, 2013 <sup>46</sup>     |
| Anisotropy                      | g                        | 0.90  | n.a.             | Jacques, 2013 <sup>46</sup>     |

200 **Supplementary Table 4. Parameters of optical properties for rat optic nerve.**

201

| Rat optic nerve |                  | Light intensity [ $\text{mW mm}^{-2}$ ] |         |          |
|-----------------|------------------|-----------------------------------------|---------|----------|
| Voltage (V)     | light Power (mW) | At the mini-LED                         | Middle  | Far end  |
| 2.3             | 0.00003          | 0.0014                                  | 0.00025 | 0.000047 |
| 2.4             | 0.00007          | 0.0032                                  | 0.00058 | 0.00011  |
| 2.5             | 0.0012           | 0.06                                    | 0.0099  | 0.0019   |
| 2.6             | 0.026            | 1.21                                    | 0.22    | 0.041    |
| 2.7             | 0.18             | 8.47                                    | 1.51    | 0.29     |
| 2.8             | 0.57             | 26.4                                    | 4.72    | 0.89     |
| 2.9             | 1.31             | 60.6                                    | 10.8    | 2.05     |
| 3               | 4.55             | 209.9                                   | 37.5    | 7.09     |
| 3.1             | 7.67             | 354.3                                   | 63.3    | 12.0     |
| 3.2             | 13.3             | 614.0                                   | 109.7   | 20.7     |
| 3.3             | 20.4             | 941.8                                   | 168.3   | 31.8     |
| 2.45            | 0.3              | 13.9                                    | 2.48    | 0.47     |

202 **Supplementary Table 5. Monte Carlo simulation of light intensities at the mini-LED**  
 203 **light-emitting surface, middle and far end of the cross section of the rat optic nerve.**

204

205

| Figures                     | Voltage       | Device   | Power                 | Pulse width                                                                                |
|-----------------------------|---------------|----------|-----------------------|--------------------------------------------------------------------------------------------|
| Fig. 2g                     | 2.5V          | mini-LED | 0.0012 mW             | Continuously-on                                                                            |
| Fig. 2j                     | 2.3 V - 3.5 V | mini-LED | 0.00003 mW - 33.1 mW  | 20 msec-on/ 2 sec-off 1 sec-on/ 4 sec-off                                                  |
| Fig. 3e                     | 2.6V          | mini-LED | 0.026 mW              | 20 msec-on/ 2 sec-off                                                                      |
| Fig. 3f                     | 3.3V          | mini-LED | 20. 4 mW              | 20 msec-on/ 2 sec-off                                                                      |
| Fig. 3g                     | 2.9 - 3.3V    | mini-LED | 1.31mW - 20. 4 mW     | 20 msec-on/ 2 sec-off                                                                      |
| Fig. 3h                     | 3V            | mini-LED | 4.55 mW               | 20 msec-on/ 2 sec-off                                                                      |
| Fig. 4d                     | 3.3 V         | mini-LED | 20.4 mW               | 20 msec-on/ 2 sec-off                                                                      |
| Fig. 4g                     | 3.3 V         | mini-LED | 81. 6mW               | 20 msec-on/ 2 sec-off                                                                      |
| Fig. 5i                     | 3.3 V         | mini-LED | 20. 4 mW              | 20 msec-on/ 2 sec-off                                                                      |
| Fig. 5j                     | 2.3 V - 3.3 V | mini-LED | 0.00003 mW - 20. 4 mW | 20 msec-on/ 2 sec-off                                                                      |
| Fig. 5k-p                   | 2.6 V - 3.2 V | mini-LED | 0.026mW – 13.30 mW    | 20 msec-on/ 2 sec-off                                                                      |
| Fig. 6c                     | 3.3 V         | mini-LED | 20. 4 mW              | 20 msec-on/ 2 sec-off                                                                      |
| Fig. 6d                     | 2.9 - 3.3 V   | mini-LED | 1.31mW - 20. 4 mW     | 20 msec-on/ 2 sec-off                                                                      |
| Fig. 6f                     | 3.3 V         | mini-LED | 81. 6 mW              | 20 msec-on/ 2 sec-off                                                                      |
| Fig. 7k                     | 3.3 V         | mini-LED | 81. 6 mW              | 20 msec-on/ 2 sec-off                                                                      |
| Supplementary Figure 5a     | 2.5 V         | mini-LED | 0.0012 mW             | 4 hour                                                                                     |
| Supplementary Figure 5b     | 2.3-3.5V      | mini-LED | 0.00003 mW -33.1 mW   | 20 msec-on/ 2 sec-off 1 sec-on/ 4 sec-off                                                  |
| Supplementary Figure 9a     | 2.6 - 3.3 V   | mini-LED | 0.026 mW- 20. 4 mW    | 20 msec-on/ 2 sec-off                                                                      |
| Supplementary Figure 10a    | 2.6 - 3.3 V   | mini-LED | 0.026 mW- 20. 4 mW    | 20 msec-on/ 2 sec-off                                                                      |
| Supplementary Figure 11a    | 2.9V          | mini-LED | 1.31mW                | 20-msec-on/20-msec-off for mini-LED1 and 500-msec-on/500-msec-off for mini-LED2 for 10 sec |
| Supplementary Figure 11b, c | 2.3 V - 3.3 V | mini-LED | 0.00003 mW - 20. 4 mW | 20 msec-on/ 2 sec-off                                                                      |
| Supplementary               | 2.3 V - 2.7   | mini-LED | 0.00003 mW - 0.18 mW  | 1 sec-on/ 4 sec-off                                                                        |

|                             |                 |          |                          |                                                                                            |
|-----------------------------|-----------------|----------|--------------------------|--------------------------------------------------------------------------------------------|
| ry Figure 12k               | V               |          |                          |                                                                                            |
| Supplementary Figure 12l    | 2.7 V           | mini-LED | 0.18 mW                  | 1 sec-on/ 4 sec-off                                                                        |
| Supplementary Figure 12m    | 2.3 V           | mini-LED | 0.00003 mW               | 1 sec-on/ 4 sec-off                                                                        |
| Supplementary Figure 12n    | 2.3-2.5V        | mini-LED | 0.00003 mW and 0.0012 mW | 1 sec-on/ 4 sec-off                                                                        |
| Supplementary Figure 12o    | 2.4 V and 2.5 V | mini-LED | 0.00003 mW and 0.0012 mW | 1 sec-on/ 4 sec-off                                                                        |
| Supplementary Figure 15f, g | 2.7 V           | mini-LED | 0.18 mW                  | LED1: 2 sec-on/ 60 sec-off                                                                 |
| Supplementary Figure 15h, i | 2.7V            | mini-LED | 0.18 mW                  | 20-msec-on/20-msec-off for mini-LED1 and 500-msec-on/500-msec-off for mini-LED2 for 10 sec |

206

207

**Supplementary Table 6. Stimulation parameters used in the manuscript.**

208

209

| Figures |                | P value | n          | Statistical analysis                          |
|---------|----------------|---------|------------|-----------------------------------------------|
| Fig. 3g | TA             | 0.012   | 8 (mice)   | Paired t test                                 |
|         | GN             | 0.025   | 8 (mice)   | Wilcoxon Signed Rank Test                     |
| Fig. 3h | ES             | 0.069   | 3 (mice)   | Paired t test                                 |
|         | SS             | 0.917   | 5 (mice)   | Paired t test                                 |
| Fig. 4d |                | <0.001  | 5 (mice)   | Paired t test                                 |
| Fig. 4g | ES             |         | 3 (mice)   |                                               |
|         | SS             |         | 5 (mice)   |                                               |
| Fig. 5k | Col 1 vs Col 4 | 0.001   | 4 (trials) | Friedman's ANOVA on Ranks with Tukey post hoc |
|         | Col 1 vs Col 5 | 0.034   |            | Friedman's ANOVA on Ranks with Tukey post hoc |
|         | Col 1 vs Col 2 | 0.451   |            | Friedman's ANOVA on Ranks with Tukey post hoc |
|         | Col 1 vs Col 3 | 0.754   |            | Friedman's ANOVA on Ranks with Tukey post hoc |
|         | Col 3 vs       | 0.065   |            | Friedman's ANOVA on Ranks with                |

|         |                    |        |            |                                                  |
|---------|--------------------|--------|------------|--------------------------------------------------|
|         | Col 4              |        |            | Tukey post hoc                                   |
|         | Col 3 vs<br>Col 5  | 0.451  |            | Friedman's ANOVA on Ranks with<br>Tukey post hoc |
|         | Col 3 vs<br>Col 2  | 0.989  |            | Friedman's ANOVA on Ranks with<br>Tukey post hoc |
|         | Col 2 vs<br>Col 4  | 0.199  |            | Friedman's ANOVA on Ranks with<br>Tukey post hoc |
|         | Col 2 vs<br>Col 5  | 0.754  |            | Friedman's ANOVA on Ranks with<br>Tukey post hoc |
|         | Col 5 vs<br>Col 4  | 0.875  |            | Friedman's ANOVA on Ranks with<br>Tukey post hoc |
| Fig. 5l | Col 2 vs<br>Col 4  | 0.001  | 4 (trials) | Friedman's ANOVA on Ranks with<br>Tukey post hoc |
|         | Col 2 vs<br>Col 5  | 0.118  |            | Friedman's ANOVA on Ranks with<br>Tukey post hoc |
|         | Col 2 vs<br>Col 1  | 0.199  |            | Friedman's ANOVA on Ranks with<br>Tukey post hoc |
|         | Col 2 vs<br>Col 3  | 0.754  |            | Friedman's ANOVA on Ranks with<br>Tukey post hoc |
|         | Col 3 vs<br>Col 4  | 0.065  |            | Friedman's ANOVA on Ranks with<br>Tukey post hoc |
|         | Col 3 vs<br>Col 5  | 0.754  |            | Friedman's ANOVA on Ranks with<br>Tukey post hoc |
|         | Col 3 vs<br>Col 1  | 0.875  |            | Friedman's ANOVA on Ranks with<br>Tukey post hoc |
|         | Col 1 vs<br>Col 4  | 0.451  |            | Friedman's ANOVA on Ranks with<br>Tukey post hoc |
|         | Col 1 vs<br>Col 5  | 0.999  |            | Friedman's ANOVA on Ranks with<br>Tukey post hoc |
|         | Col 5 vs<br>Col 4  | 0.605  |            | Friedman's ANOVA on Ranks with<br>Tukey post hoc |
| Fig. 5m | Col 3 vs.<br>Col 4 | <0.001 | 4 (trials) | One way ANOVA with Tukey post hoc                |
|         | Col 3 vs.<br>Col 2 | <0.001 |            | One way ANOVA with Tukey post hoc                |
|         | Col 3 vs.<br>Col 5 | <0.001 |            | One way ANOVA with Tukey post hoc                |
|         | Col 3 vs.<br>Col 1 | <0.001 |            | One way ANOVA with Tukey post hoc                |
|         | Col 1 vs.<br>Col 4 | <0.001 |            | One way ANOVA with Tukey post hoc                |
|         | Col 1 vs.<br>Col 2 | 0.001  |            | One way ANOVA with Tukey post hoc                |



|         |                    |        |              |                                                  |
|---------|--------------------|--------|--------------|--------------------------------------------------|
|         | Col 1 vs.<br>Col 5 | 0.141  |              | One way ANOVA with Tukey post hoc                |
|         | Col 5 vs.<br>Col 4 | 0.007  |              | One way ANOVA with Tukey post hoc                |
|         | Col 5 vs.<br>Col 2 | 0.122  |              | One way ANOVA with Tukey post hoc                |
|         | Col 2 vs.<br>Col 4 | 0.566  |              | One way ANOVA with Tukey post hoc                |
| Fig. 5n | Col 4 vs.<br>Col 5 | <0.001 | 4 ( trials ) | One way ANOVA with Tukey post hoc                |
|         | Col 4 vs.<br>Col 2 | <0.001 |              | One way ANOVA with Tukey post hoc                |
|         | Col 4 vs.<br>Col 1 | <0.001 |              | One way ANOVA with Tukey post hoc                |
|         | Col 4 vs.<br>Col 3 | <0.001 |              | One way ANOVA with Tukey post hoc                |
|         | Col 3 vs.<br>Col 5 | <0.001 |              | One way ANOVA with Tukey post hoc                |
|         | Col 3 vs.<br>Col 2 | <0.001 |              | One way ANOVA with Tukey post hoc                |
|         | Col 3 vs.<br>Col 1 | 0.88   |              | One way ANOVA with Tukey post hoc                |
|         | Col 1 vs.<br>Col 5 | <0.001 |              | One way ANOVA with Tukey post hoc                |
|         | Col 1 vs.<br>Col 2 | <0.001 |              | One way ANOVA with Tukey post hoc                |
|         | Col 2 vs.<br>Col 5 | 0.096  |              | One way ANOVA with Tukey post hoc                |
| Fig. 5o | Col 5 vs<br>Col 3  | 0.007  | 4 ( trials ) | Friedman's ANOVA on Ranks with<br>Tukey post hoc |
|         | Col 5 vs<br>Col 1  | 0.034  |              | Friedman's ANOVA on Ranks with<br>Tukey post hoc |
|         | Col 5 vs<br>Col 4  | 0.451  |              | Friedman's ANOVA on Ranks with<br>Tukey post hoc |
|         | Col 5 vs<br>Col 2  | 0.989  |              | Friedman's ANOVA on Ranks with<br>Tukey post hoc |
|         | Col 2 vs<br>Col 3  | 0.034  |              | Friedman's ANOVA on Ranks with<br>Tukey post hoc |
|         | Col 2 vs<br>Col 1  | 0.118  |              | Friedman's ANOVA on Ranks with<br>Tukey post hoc |
|         | Col 2 vs<br>Col 4  | 0.754  |              | Friedman's ANOVA on Ranks with<br>Tukey post hoc |
|         | Col 4 vs<br>Col 3  | 0.451  |              | Friedman's ANOVA on Ranks with<br>Tukey post hoc |

|                                  |                   |        |            |                                                     |
|----------------------------------|-------------------|--------|------------|-----------------------------------------------------|
|                                  | Col 4 vs<br>Col 1 | 0.754  |            | Friedman's ANOVA on Ranks with<br>Tukey post hoc    |
|                                  | Col 1 vs<br>Col 3 | 0.989  |            | Friedman's ANOVA on Ranks with<br>Tukey post hoc    |
| Fig. 5p                          | Col 5 vs<br>Col 1 | 0.005  | 4 (trials) | Friedman's ANOVA on Ranks with<br>Tukey post hoc    |
|                                  | Col 5 vs<br>Col 3 | 0.102  |            | Friedman's ANOVA on Ranks with<br>Tukey post hoc    |
|                                  | Col 5 vs<br>Col 4 | 0.118  |            | Friedman's ANOVA on Ranks with<br>Tukey post hoc    |
|                                  | Col 5 vs<br>Col 2 | 0.719  |            | Friedman's ANOVA on Ranks with<br>Tukey post hoc    |
|                                  | Col 2 vs<br>Col 1 | 0.175  |            | Friedman's ANOVA on Ranks with<br>Tukey post hoc    |
|                                  | Col 2 vs<br>Col 3 | 0.754  |            | Friedman's ANOVA on Ranks with<br>Tukey post hoc    |
|                                  | Col 2 vs<br>Col 4 | 0.788  |            | Friedman's ANOVA on Ranks with<br>Tukey post hoc    |
|                                  | Col 4 vs<br>Col 1 | 0.819  |            | Friedman's ANOVA on Ranks with<br>Tukey post hoc    |
|                                  | Col 4 vs<br>Col 3 | 1      |            | Friedman's ANOVA on Ranks with<br>Tukey post hoc    |
|                                  | Col 3 vs<br>Col 1 | 0.848  |            | Friedman's ANOVA on Ranks with<br>Tukey post hoc    |
| Fig. 6d<br>shoulder<br>adduction | Col 2 vs<br>Col 1 | <0.001 | 14 (mice)  | Friedman's RM ANOVA on Ranks with<br>Tukey post hoc |
|                                  | Col 2 vs<br>Col 4 | 0.227  |            | Friedman's RM ANOVA on Ranks with<br>Tukey post hoc |
|                                  | Col 2 vs<br>Col 3 | 0.552  |            | Friedman's RM ANOVA on Ranks with<br>Tukey post hoc |
|                                  | Col 3 vs<br>Col 1 | 0.001  |            | Friedman's RM ANOVA on Ranks with<br>Tukey post hoc |
|                                  | Col 3 vs<br>Col 4 | 0.936  |            | Friedman's RM ANOVA on Ranks with<br>Tukey post hoc |
|                                  | Col 4 vs<br>Col 1 | 0.011  |            | Friedman's RM ANOVA on Ranks with<br>Tukey post hoc |
| Fig. 6d<br>elbow<br>extension    | Col 2 vs<br>Col 1 | <0.001 | 14 (mice)  | Friedman's RM ANOVA on Ranks with<br>Tukey post hoc |
|                                  | Col 2 vs<br>Col 3 | <0.001 |            | Friedman's RM ANOVA on Ranks with<br>Tukey post hoc |
|                                  | Col 2 vs<br>Col 4 | 0.001  |            | Friedman's RM ANOVA on Ranks with<br>Tukey post hoc |

|                                |                    |        |           |                                                     |
|--------------------------------|--------------------|--------|-----------|-----------------------------------------------------|
|                                | Col 4 vs<br>Col 1  | 0.912  |           | Friedman's RM ANOVA on Ranks with<br>Tukey post hoc |
|                                | Col 4 vs<br>Col 3  | 0.999  |           | Friedman's RM ANOVA on Ranks with<br>Tukey post hoc |
|                                | Col 3 vs<br>Col 1  | 0.956  |           | Friedman's RM ANOVA on Ranks with<br>Tukey post hoc |
| Fig. 6d<br>wrist<br>extension  | Col 3 vs.<br>Col 4 | <0.001 | 7 (mice)  | One way RM ANOVA with Tukey post<br>hoc             |
|                                | Col 3 vs.<br>Col 1 | <0.001 |           | One way RM ANOVA with Tukey post<br>hoc             |
|                                | Col 3 vs.<br>Col 2 | <0.001 |           | One way RM ANOVA with Tukey post<br>hoc             |
|                                | Col 2 vs.<br>Col 4 | 0.372  |           | One way RM ANOVA with Tukey post<br>hoc             |
|                                | Col 2 vs.<br>Col 1 | 1      |           | One way RM ANOVA with Tukey post<br>hoc             |
|                                | Col 1 vs.<br>Col 4 | 0.378  |           | One way RM ANOVA with Tukey post<br>hoc             |
| Fig. 6d<br>wrist<br>flexion    | Col 4 vs<br>Col 3  | <0.001 | 12 (mice) | Friedman's RM ANOVA on Ranks with<br>Tukey post hoc |
|                                | Col 4 vs<br>col 1  | 0.045  |           | Friedman's RM ANOVA on Ranks with<br>Tukey post hoc |
|                                | Col 4 vs<br>Col 2  | 0.685  |           | Friedman's RM ANOVA on Ranks with<br>Tukey post hoc |
|                                | Col 2 vs<br>Col 3  | 0.001  |           | Friedman's RM ANOVA on Ranks with<br>Tukey post hoc |
|                                | Col 2 vs<br>Col 1  | 0.436  |           | Friedman's RM ANOVA on Ranks with<br>Tukey post hoc |
|                                | Col 1 vs<br>Col 3  | 0.119  |           | Friedman's RM ANOVA on Ranks with<br>Tukey post hoc |
| Fig. 6d<br>finger<br>extension | Col 4 vs<br>Col 3  | <0.001 | 10 (mice) | Friedman's RM ANOVA on Ranks with<br>Tukey post hoc |
|                                | Col 4 vs<br>Col 1  | 0.003  |           | Friedman's RM ANOVA on Ranks with<br>Tukey post hoc |
|                                | Col 4 vs<br>Col 2  | 0.046  |           | Friedman's RM ANOVA on Ranks with<br>Tukey post hoc |
|                                | Col 2 vs<br>Col 3  | 0.307  |           | Friedman's RM ANOVA on Ranks with<br>Tukey post hoc |
|                                | Col 2 vs<br>Col 1  | 0.822  |           | Friedman's RM ANOVA on Ranks with<br>Tukey post hoc |
|                                | Col 1 vs           | 0.822  |           | Friedman's RM ANOVA on Ranks with                   |

|           |                   |        |                                                   |                                                        |
|-----------|-------------------|--------|---------------------------------------------------|--------------------------------------------------------|
|           | Col 3             |        |                                                   | Tukey post hoc                                         |
| Fig. 6e   | ES                |        | 5 (mice)                                          | /                                                      |
| Fig. 6f   | SS                |        | 3 (mice)                                          | /                                                      |
| Fig. 7d   |                   | 0.115  | Implant:<br>4 (mice) ;<br>No Implant<br>6 (mice)  | Unpaired t test                                        |
| Fig. 7f   |                   | 0.642  | Implant:<br>4 (mice) ;<br>No Implant:<br>6 (mice) | Unpaired t test                                        |
| Fig. S9   | SS                |        | 5 (mice)                                          |                                                        |
|           | ES                |        | 3 (mice)                                          |                                                        |
| Fig. S10  | SS                |        | 7 (mice)                                          |                                                        |
|           | ES                |        | 3 (mice)                                          |                                                        |
| Fig. S12o |                   | 0.033  | 7 (rats)                                          | Paired t test                                          |
| Fig. S15g | Col 1 vs<br>Col 3 | 0.008  | 5 (rats)                                          | One way repeated measures ANOVA<br>with Tukey post hoc |
| Fig. S15i | Led1              | 0.001  | 5 (rats)                                          | Two way repeated measures ANOVA<br>with Tukey post hoc |
|           | Led2              | <0.001 | 5 (rats)                                          | Two way repeated measures ANOVA<br>with Tukey post hoc |

210 **Supplementary Table 7. Summary for statistical details in the manuscript.**

211
